# Supplementary material for: Lung and Heart Biology of the Dp16 Mouse Model of down Syndrome: Implications for Studying Cardiopulmonary Disease
Source: MDPI journal article supplement (doi:10.3390/genes14091819), 2023-09-19

Supplemental Table S1

| Antibody               | Vendor         | Catalog # | Concentration | Species | Application |
|------------------------|----------------|-----------|---------------|---------|-------------|
| IFNAR1                 | Abclonal       | A18594    | 1:1000        | Rabbit  | Immunoblot  |
| IFNGR2                 | Abclonal       | A14221    | 1:1000        | Rabbit  | Immunoblot  |
| Stat1                  | Cell Signaling | D4Y6Z     | 1:1000        | Rabbit  | Immunoblot  |
| p-Stat1                | Invitrogen     | 33-3400   | 1:1000        | Mouse   | Immunoblot  |
| Stat3                  | Cell Signaling | 79D7      | 1:2000        | Rabbit  | Immunoblot  |
| pStat3                 | Cell Signaling | D3A7      | 1:500         | Rabbit  | Immunoblot  |
| PAFR                   | Bioss          | 1478R     | 1:500         | Rabbit  | Immunoblot  |
| IL-10Rb                | Bioss          | 2602R     | 1:500         | Rabbit  | Immunoblot  |
| GAPDH                  | Cell Signaling | D16H11    | 1:2000        | Rabbit  | Immunoblot  |
| Anti-rabbit IgG<br>HRP | Cell signaling | 7074S     | 1:2000        | Goat    | Immunoblot  |
| Anti-mouse IgG<br>HRP  | Millipore      | AP124P    | 1:5000        | Goat    | Immunoblot  |
| CD3                    | Abcam          | AB5690    | 1:250         | Rabbit  | Tissue IF   |
| CD45R                  | Invitrogen     | RA3-6B2   | 1:500         | Rat     | Tissue IF   |
| Anti-Rat 488           | Invitrogen     | A4826TR   | 1:500         | Goat    | Tissue IF   |
| Anti-Rabbit 594        | Invitrogen     | A11037    | 1:500         | Goat    | Tissue IF   |

Supplemental Figure S1

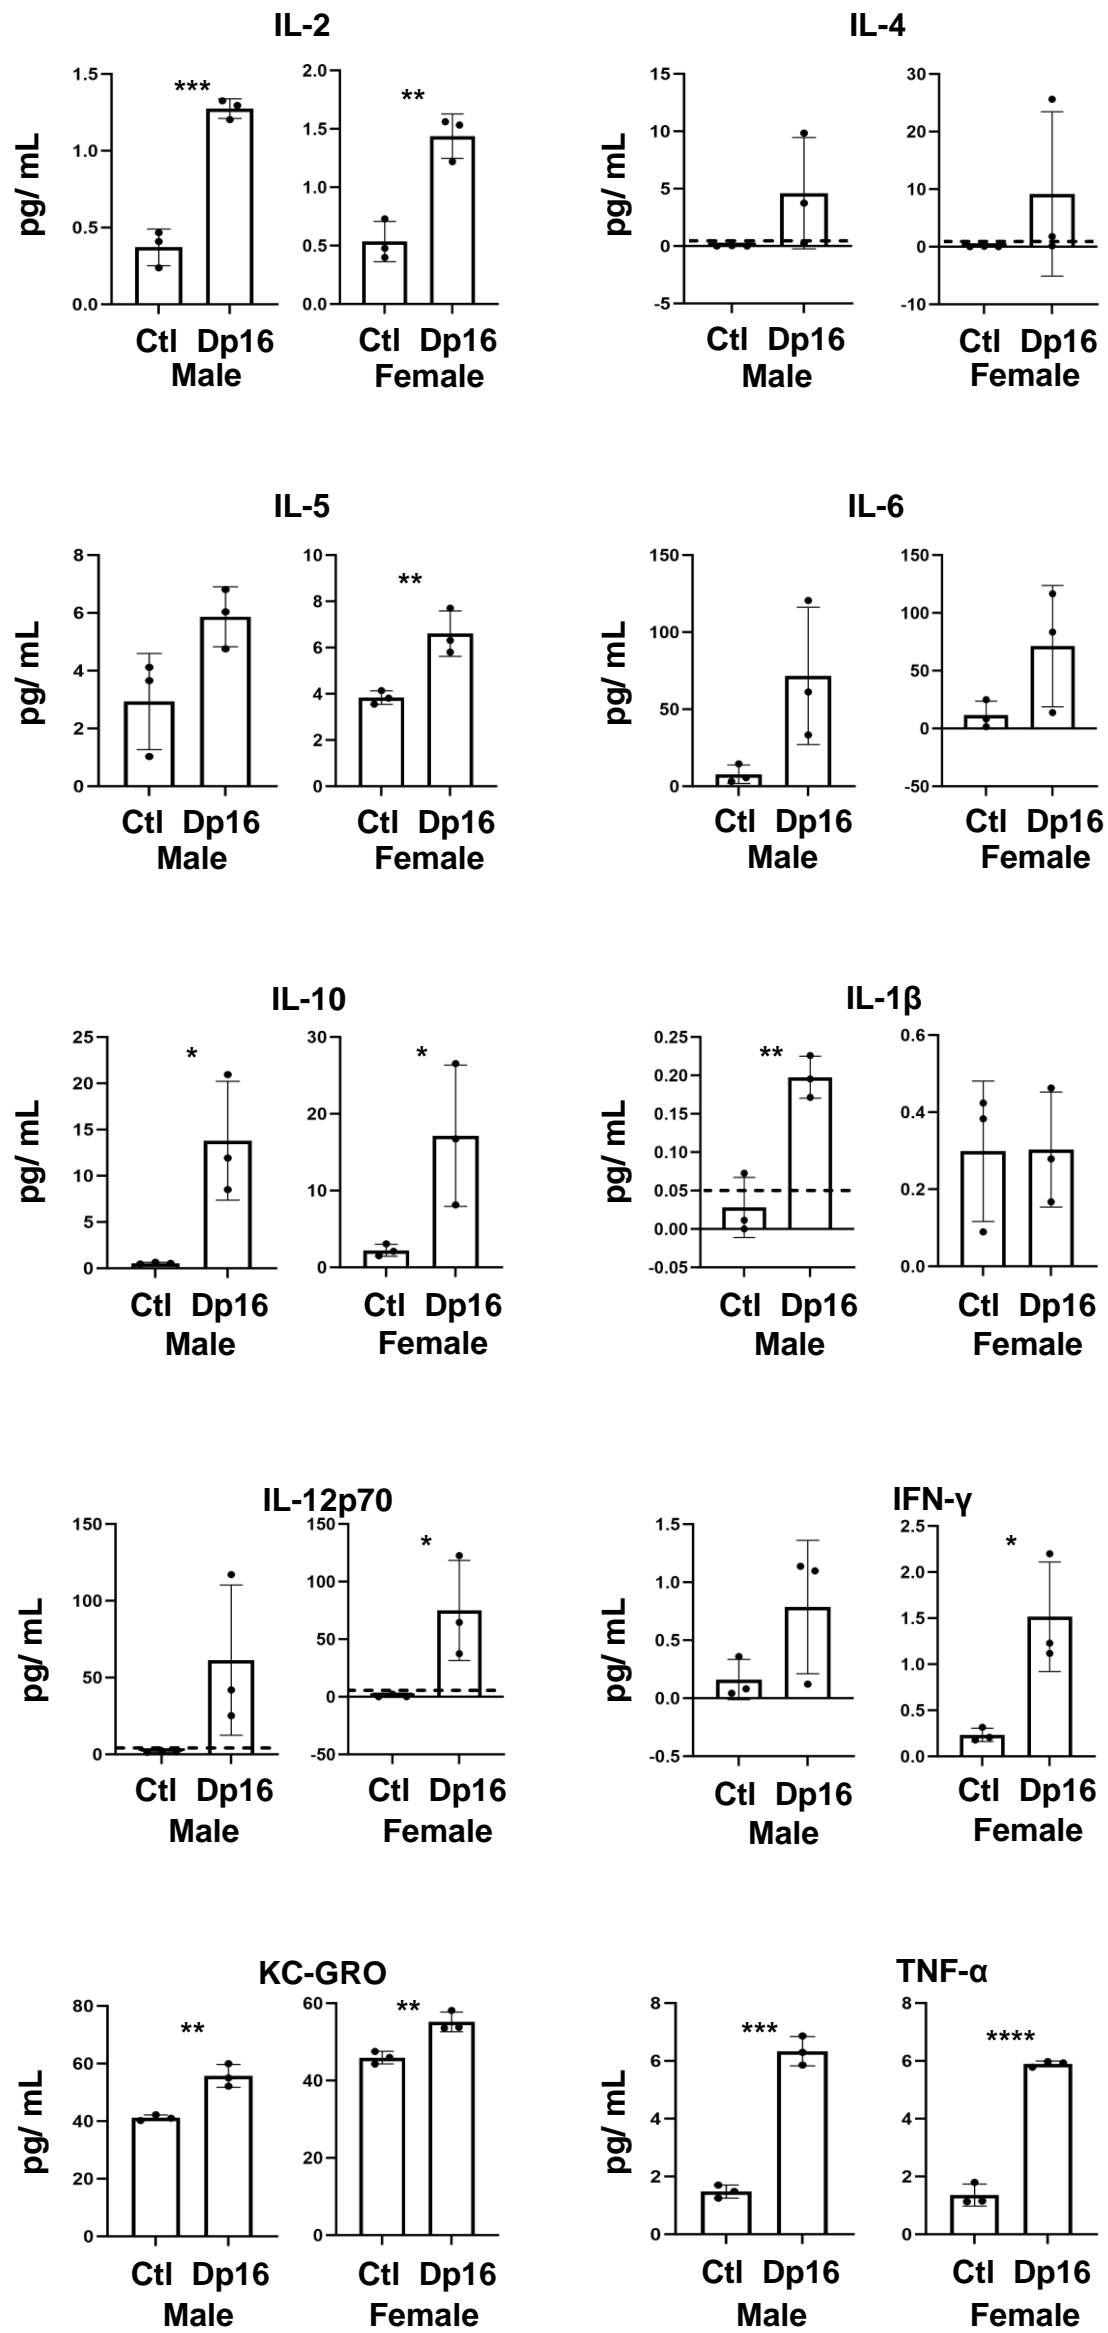

Supplemental Figure S2

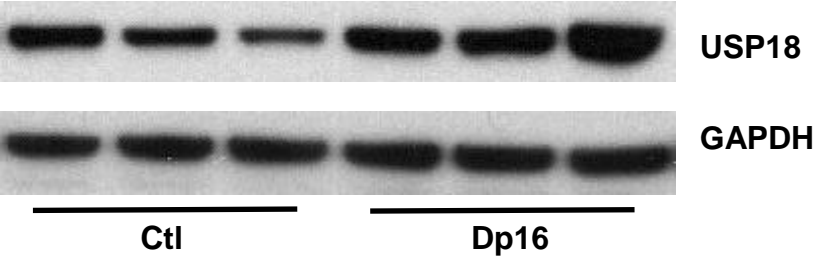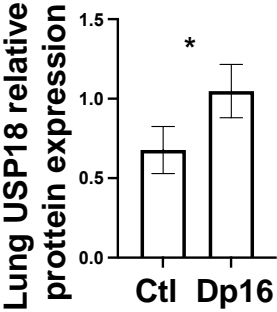

Supplemental Figure S3

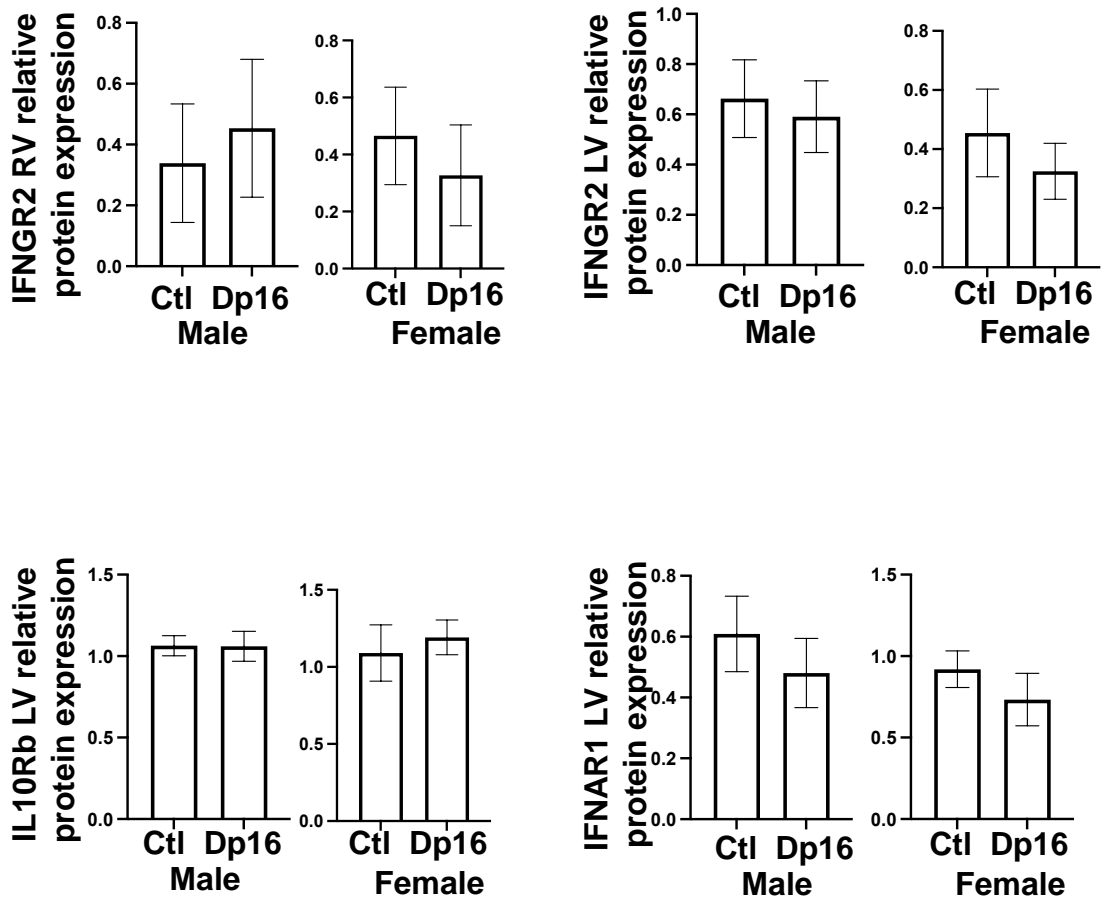

Supplement: s1 [file s1]
